# Supplementary material for: Preliminary Results of CitraVes™ Effects on Low Density Lipoprotein Cholesterol and Waist Circumference in Healthy Subjects after 12 Weeks: A Pilot Open-Label Study
Source: MDPI journal article supplement (doi:10.3390/metabo11050276), 2021-04-27
Supplement: s1 [file s1]

## Supplementary Material

### Supplementary Data

**Table S1.** Hematological parameters of healthy volunteers for each experimental time. Mean [95% CI], n=19 (women, n=9; men, n=10).

| Parameter                              | Baseline          | 4 weeks                        | 12 weeks                         | <i>F, p-value</i>                 | Reference value* |
|----------------------------------------|-------------------|--------------------------------|----------------------------------|-----------------------------------|------------------|
| <b>RBC (10<sup>6</sup> /μl)</b>        | 4.82 [4.54, 5.10] | 4.88 [4.62, 5.14]              | 4.93 [4.62, 5.24]                | NS                                | 3.90 - 5.15      |
| <b>Hgb (g/dl)</b>                      | 13.8 [13.2, 14.5] | 14.0 [13.5, 14.6]              | 14.2 [13.4, 14.9]                | NS                                | 12.0 - 15.4      |
| <b>Hct (%)</b>                         | 41.6 [39.7, 43.6] | 42.4 [40.8, 43.9]              | 41.4 [39.4, 43.4]                | NS                                | 35.5 - 45.0      |
| <b>MCV (fl)</b>                        | 86.8 [83.6, 89.9] | 87.3 [83.6, 89.9]              | 84.7 [81.5, 87.8] <sup>2,3</sup> | <i>F</i> =27.20, <i>p</i> <0.0005 | 78.5 - 94.5      |
| <b>MCH (pg)</b>                        | 28.9 [27.7, 30.0] | 28.9 [27.8, 30.1]              | 29.0 [27.7, 30.3]                | NS                                | 26.3 - 32.8      |
| <b>MCHC (g/dl)</b>                     | 33.3 [32.8, 33.7] | 33.1 [32.7, 33.6]              | 34.2 [33.7, 34.7] <sup>2,3</sup> | <i>F</i> =12.79, <i>p</i> <0.0005 | 31.5 - 36.0      |
| <b>RDW.SD (fl)</b>                     | 41 [40, 43]       | 41 [40, 43]                    | 40 [39, 41]                      | NS                                | 38 - 48          |
| <b>RDW.CV (%)</b>                      | 13 [13, 14]       | 13 [13, 14]                    | 13 [13, 14]                      | NS                                | 11 - 15          |
| <b>WBC (10<sup>3</sup>/μl)</b>         | 6.6 [5.4, 7.7]    | 6.7 [6.0, 7.3]                 | 7.0 [6.3, 7.7] <sup>3</sup>      | <i>F</i> =5.90, <i>p</i> =0.007   | 4.3 - 11.1       |
| <b>Neutrophils (10<sup>3</sup>/μl)</b> | 3.9 [2.7, 5.0]    | 4.0 [3.3, 4.6]                 | 4.1 [3.5, 4.7] <sup>3</sup>      | <i>F</i> =5.06, <i>p</i> =0.012   | 1.7 - 7.9        |
| <b>Lymphocytes (10<sup>3</sup>/μl)</b> | 2.0 [1.7, 2.3]    | 2.0 [1.7, 2.3]                 | 2.1 [1.8, 2.4]                   | NS                                | 1.2 - 5.0        |
| <b>Monocytes (10<sup>3</sup>/μl)</b>   | 0.50 [0.43, 0.57] | 0.54 [0.49, 0.59]              | 0.57 [0.50, 0.64]                | NS                                | 0.10 - 0.93      |
| <b>Eosinophils (10<sup>3</sup>/μl)</b> | 0.15 [0.12, 0.18] | 0.17 [0.13, 0.21]              | 0.19 [0.14, 0.25]                | NS                                | 0.02 - 0.60      |
| <b>Basophils (10<sup>3</sup>/μl)</b>   | 0.04 [0.03, 0.05] | 0.04 [0.03, 0.05]              | 0.05 [0.04, 0.06]                | <i>F</i> =5.08, <i>p</i> =0.012   | 0.00 - 0.20      |
| <b>Neutrophils (%)</b>                 | 56.7 [51.3, 62.3] | 57.8 [53.2, 63.4]              | 57.7 [53.3, 62.1]                | NS                                | 37.5 - 77.0      |
| <b>Lymphocytes (%)</b>                 | 32.2 [27.5, 36.9] | 30.3 [25.8, 34.9]              | 30.4 [26.6, 34.3]                | NS                                | 20.0 - 45.5      |
| <b>Monocytes (%)</b>                   | 7.9 [7.1, 8.7]    | 8.2 [7.5, 8.9]                 | 8.4 [7.5, 9.2]                   | NS                                | 1.6 - 9.0        |
| <b>Eosinophils (%)</b>                 | 2.5 [1.9, 3.1]    | 2.5 [1.9, 3.0]                 | 2.7 [2.0, 3.4]                   | NS                                | 0.5 - 5.5        |
| <b>Basophils (%)</b>                   | 0.7 [0.5, 0.8]    | 0.7 [0.5, 0.9]                 | 0.8 [0.6, 1.0]                   | NS                                | 0.0 - 1.8        |
| <b>IG (10<sup>3</sup>/μl)</b>          | 0.02 [0.02, 0.02] | 0.03 [0.01, 0.05]              | 0.03 [0.02, 0.04] <sup>2,3</sup> | <i>F</i> =5.80, <i>p</i> =0.007   | 0.00 - 0.03      |
| <b>IG (%)</b>                          | 0.31 [0.24, 0.38] | 0.37 [0.19, 0.55]              | 0.44 [0.31, 0.58] <sup>2,3</sup> | <i>F</i> =5.69 <i>p</i> =0.008    | 0.00 - 0.05      |
| <b>PLT (10<sup>3</sup>/μl)</b>         | 217 [190, 243]    | 236 [213, 258]                 | 231 [210, 252]                   | NS                                | 170 - 400        |
| <b>PDW (fl)</b>                        | 15 [14, 16]       | 14 [14, 15]                    | 15 [14, 16]                      | NS                                | 9 - 14           |
| <b>MPV (fl)</b>                        | 11.6 [11.3, 12.0] | 11.5 [11.1, 11.9]              | 11.5 [11.1, 11.9]                | NS                                | 9.2 - 12.8       |
| <b>P.LCR (%)</b>                       | 38.0 [35.4, 40.7] | 37.4 [34.2, 40.6]              | 37.9 [34.8, 41.0]                | NS                                | 21.6 - 50.0      |
| <b>PCT (%)</b>                         | 0.25 [0.23, 0.27] | 0.27 [0.25, 0.29] <sup>1</sup> | 0.28 [0.26, 0.30] <sup>3</sup>   | <i>F</i> =7.80, <i>p</i> =0.002   | 0.20 - 0.36      |

## Supplementary Material

Pairwise comparisons among experimental times (<sup>1</sup>, 4 weeks *versus* Baseline; <sup>2</sup>, 12 weeks *versus* 4 weeks; and <sup>3</sup>, 12 weeks *versus* Baseline): MCV - <sup>2</sup>,  $p < 0.0005$ ; <sup>3</sup>,  $p < 0.0005$ ; MCHC - <sup>2</sup>,  $p < 0.0005$ ; <sup>3</sup>,  $p < 0.0005$ ; WBC - <sup>3</sup>,  $p < 0.05$ ; Neutrophils ( $10^3/\mu\text{l}$ ) - <sup>3</sup>,  $p < 0.05$ ; IG ( $10^3/\mu\text{l}$ ) - <sup>2</sup>,  $p < 0.05$ ; <sup>3</sup>,  $p < 0.05$ ; IG % - <sup>2</sup>,  $p < 0.05$ ; <sup>3</sup>,  $p < 0.05$ ; PCT (%) - <sup>1</sup>,  $p < 0.05$ ; <sup>3</sup>,  $p < 0.005$ . \*The reference values refer to healthy subjects in according to the official guidelines.
